# Supplementary material for: In Vitro/In Vivo Translation of Synergistic Combination of MDM2 and MEK Inhibitors in Melanoma Using PBPK/PD Modelling: Part I
Source: MDPI journal article supplement (doi:10.3390/ijms232112984), 2022-10-26
Supplement: s1 [file s1]

# In Vitro/In Vivo Translation of Synergistic Combination of MDM2 and MEK Inhibitors in Melanoma Using PBPK/PD Modelling: Part I

Jakub Witkowski, Sebastian Polak, Zbigniew Rogulski and Dariusz Pawelec

**Table S1.** Siremadlin and Trametinib resistant population estimates. For MTS assay  $n = 4$ , last observation after 72h and for RealTime-Glo assay  $n = 3$  and last observation after 80h.

| Compound            | Assay        | Max concentration (nM) | % of viability at the last measurement $\pm$ SD |
|---------------------|--------------|------------------------|-------------------------------------------------|
| Siremadlin (HDM201) | MTS          | 200                    | 21.910 $\pm$ 5.922                              |
|                     | RealTime-Glo | 4000                   | 20.980 $\pm$ 6.855                              |
|                     | Mean         | -                      | 21.445 $\pm$ 6.389                              |
| Trametinib          | MTS          | 4                      | 13.340 $\pm$ 2.596                              |
|                     | RealTime-Glo | 40                     | 14.854 $\pm$ 2.592                              |
|                     | Mean         | -                      | 14.097 $\pm$ 2.594                              |

**Table S2.** Drug interaction between Siremadlin and Trametinib on A375 cells. For RealTime-Glo assay  $n = 3$ . Synergyfinder package analysis.

| Timepoint [h]          | $n$ | Synergy ZIP $\delta$ | Synergy Loewe $\delta$ | Synergy HSA $\delta$ | Synergy Bliss $\delta$ | Models score $\delta$ |
|------------------------|-----|----------------------|------------------------|----------------------|------------------------|-----------------------|
| 12                     | 3   | 9.293                | 2.319                  | -1.391               | 9.931                  | 5.038                 |
| 24                     | 3   | 11.459               | -3.098                 | 5.120                | 14.929                 | 7.103                 |
| 28                     | 2   | 5.976                | 1.196                  | 7.997                | 8.925                  | 6.023                 |
| 32                     | 2   | 4.878                | 2.821                  | 8.816                | 6.720                  | 5.808                 |
| 36                     | 3   | 5.396                | 2.149                  | 11.654               | 7.441                  | 6.660                 |
| 48                     | 3   | 6.083                | 4.289                  | 14.661               | 6.339                  | 7.843                 |
| 52                     | 3   | 2.903                | 7.124                  | 13.463               | 3.046                  | 6.634                 |
| 56                     | 3   | 3.548                | 8.466                  | 14.243               | 3.455                  | 7.428                 |
| 60                     | 3   | 3.967                | 9.633                  | 14.754               | 3.859                  | 8.054                 |
| 72                     | 3   | 5.505                | 10.613                 | 16.316               | 5.432                  | 9.467                 |
| 76                     | 3   | 5.069                | 12.106                 | 16.498               | 4.989                  | 9.666                 |
| 80                     | 3   | 5.252                | 12.737                 | 16.733               | 5.199                  | 9.980                 |
| Mean (datapoints >24h) |     | 4.858                | 7.113                  | 13.513               | 5.540                  | 7.756                 |
| SD                     |     | 1.346                | 4.355                  | 3.111                | 1.957                  | 1.614                 |

**Table S3.** Drug interaction between Siremadlin and Trametinib on A375 cells. For RealTime-Glo assay  $n = 3$ . Synergy package analysis.

| Timepoint (h)               | $n$ | beta  | alpha12 | alpha21    | gamma12 | gamma21    | $R^2$ |
|-----------------------------|-----|-------|---------|------------|---------|------------|-------|
| 12                          | 3   | 0.194 | 1.150   | 0.703      | 63.546  | 18.590     | 0.299 |
| 24                          | 3   | 0.656 | 0.888   | 2979.928   | 7.420   | 0.691      | 0.734 |
| 28                          | 2   | 0.318 | 1.418   | 74,999.607 | 0.742   | 68,773.056 | 0.886 |
| 32                          | 2   | 0.334 | 1.688   | 50,000.132 | 1.156   | 0.052      | 0.940 |
| 36                          | 3   | 0.280 | 1.071   | 65.504     | 1.040   | 0.565      | 0.938 |
| 48                          | 3   | 0.244 | 1.547   | 1.746      | 1.032   | 0.543      | 0.977 |
| 52                          | 3   | 0.227 | 1.636   | 1.123      | 0.871   | 0.497      | 0.988 |
| 56                          | 3   | 0.218 | 1.757   | 1.484      | 0.865   | 0.592      | 0.990 |
| 60                          | 3   | 0.193 | 2.583   | 1.583      | 0.914   | 0.697      | 0.989 |
| 72                          | 3   | 0.224 | 3.012   | 1.363      | 0.837   | 0.578      | 0.989 |
| 76                          | 3   | 0.210 | 3.162   | 1.359      | 0.744   | 0.667      | 0.992 |
| 80                          | 3   | 0.194 | 3.074   | 1.453      | 0.805   | 0.680      | 0.992 |
| Mean (t >24h, $R^2 > 0.8$ ) |     | 0.244 | 2.095   | 12,507.535 | 0.901   | 6877.793   | 0.968 |
| SD                          |     | 0.050 | 0.780   | 26,999.124 | 0.136   | 21,747.779 | 0.036 |
| Mean (t >48h, $R^2 > 0.8$ ) |     | 0.216 | 2.396   | 1.444      | 0.867   | 0.608      | 0.988 |
| SD                          |     | 0.018 | 0.727   | 0.195      | 0.091   | 0.075      | 0.005 |

**Table S4.** Synergyfinder analysis parameters.

| Synergyfinder parameter | Selected option | Notes                                                                          |
|-------------------------|-----------------|--------------------------------------------------------------------------------|
| Data type               | Viability       | -                                                                              |
| Impute                  | True            | Option to handle missing values in drug combination matrices if there were any |
| Noise                   | False           | There was no addition of small random numbers to response data                 |
| Correction              | Non             | There was no adjusting of the baseline of the response matrix                  |

**Table S5.** Synergy analysis parameters.

| Synergy parameter    | Selected option/range                                          | Notes                                                                                    |
|----------------------|----------------------------------------------------------------|------------------------------------------------------------------------------------------|
| MuSyC variant        | full                                                           | -                                                                                        |
| E0 bounds            | (0.8, 1.2)                                                     | -                                                                                        |
| E1 bounds            | Automatically selected bounds based on round min/max E1 values | rounded to 1 decimal place                                                               |
| E2 bounds            | Automatically selected bounds based on round min/max E2 values | rounded to 1 decimal place                                                               |
| E3 bounds            | Automatically selected bounds based on round min/max E3 values | rounded to 1 decimal place                                                               |
| Bootstrap iterations | 100                                                            | -                                                                                        |
| Max_nfev             | 5000                                                           | maximum number of function evaluations, a high number to ensure that model will converge |

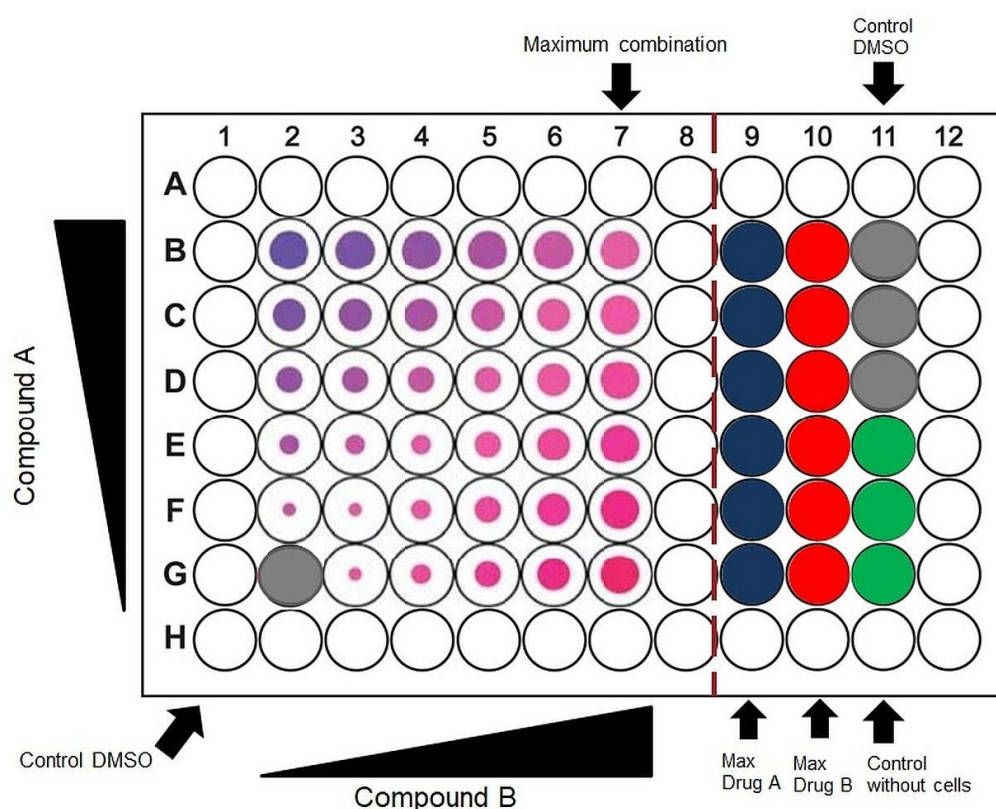

**Figure S1.** MTS assay plate layout used in combination study. Compound A (Drug A – represents HDM201). Compound B (Drug B – represents Trametinib). Control without cells consisted of an appropriate volume of cell culture medium.

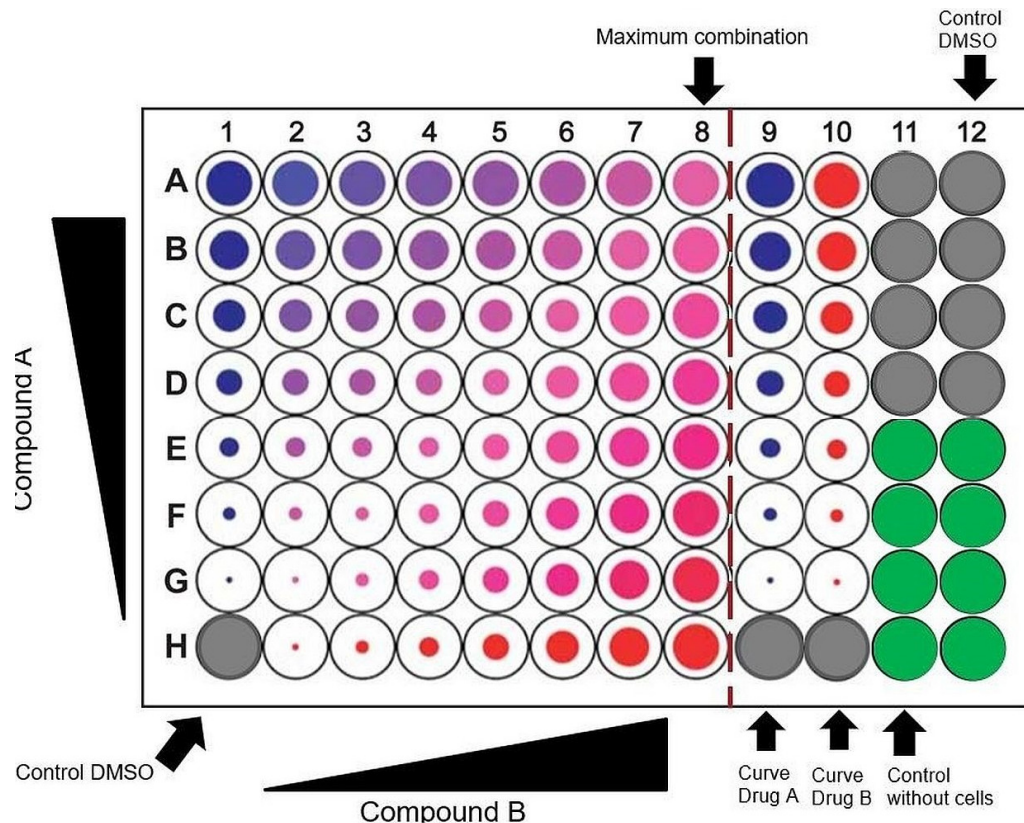

**Figure S2.** RealTime-Glo assay plate layout used in combination study. Compound A (Drug A – represents HDM201). Compound B (Drug B – represents Trametinib). Control without cells consisted of an appropriate volume of cell culture medium.

**Code S1.** R script for drug combination analysis with the use of Synergyfinder package. The script is processing all files in the input directory and prints drug interaction metrics in the console and log.

```
# R code for calculating drug interaction metrics using Synergyfinder package.

# load needed libraries
# futile.logger library provides a logging utility in order to follow the analysis progress

library(synergyfinder)
library(readxl)
library(xlsx)
library("futile.logger")

# set your input and output directories
currentPath = getwd()
inputDirPath = file.path("set here your input path")
outputDirPath = file.path("set here your output path")

options(width = 60)

# read your input data excel file
prepareInputData <- function(file) {
  input_file = file.path(inputDirPath, file)
  input_data <- read_excel(
    input_file,
    col_types = c(
      "numeric",
      "text",
      "text",
      "numeric",
```

```

        "numeric",
        "numeric",
        "text",
        "text"
    )
)
# set Synergyfinder analysis parameters
data <- ReshapeData(
    input_data,
    data.type = "viability",
    impute = TRUE,
    noise = FALSE,
    correction = "non"
)
return(data)
}
# preparing your output catalog structure based on assumption that particular experiments in input data will
have following structured name: Exp (N) (cell line name) (drug 1 name)+(drug 2 name)
prepareExperimentDir <- function(file) {
    setwd(outputDirPath)

    # directory_name = sub("Exp \\d\\s", "", file)
    directory_name = strsplit(file, " ")[1][3]
    dir.create(directory_name, showWarnings = FALSE)

    localDirPath = file.path(outputDirPath, directory_name)

    setwd(localDirPath)

    return(localDirPath)
}
# calculating drug interaction metrics using particular models (methods)
countScores <- function(data) {
    scoreZIP <- CalculateSynergy(data = data, method = "ZIP")
    attr(scoreZIP, "method_name") <- "ZIP"
    scoreHSA <- CalculateSynergy(data = data, method = "HSA")
    attr(scoreHSA, "method_name") <- "HSA"
    scoreBliss <- CalculateSynergy(data = data, method = "Bliss")
    attr(scoreBliss, "method_name") <- "Bliss"
    scoreLoewe <- CalculateSynergy(data = data, method = "Loewe")
    attr(scoreLoewe, "method_name") <- "Loewe"

    scores = list(scoreZIP, scoreHSA, scoreBliss, scoreLoewe)

    return(scores)
}
# Saving plots showing drug interaction patterns at different concentrations calculated with particular
methods
SaveScoreFiles <- function(scores, file, localDirPath) {

    summary_scores <- list()

    for (score in scores) {
        plot_filename_2d = paste("synergy", attr(score, "method_name"), file, "2D", sep = " ")
        # plot synergy method returns summary score values
        summary_score = PlotSynergy(
            score, "2D",
            save.file = TRUE,
            file.type = 'jpeg',
            file.name = c(plot_filename_2d)
        )
        #add calculated metrics method name (ZIP/HSA/Bliss/Loewe)
    }
}

```

```

        summary_scores[attr(score, "method_name")] <- summary_score
    }
    return(summary_scores)
}

# operations during processing particular files
ProcessExperiment <- function(file) {
    data = prepareInputData(file)

    #adjust file name for synergyfinder images
    file = strsplit(file, ".")[[1]][1]

    localDirPath = prepareExperimentDir(file)

    scores = countScores(data)

    summary_scores = SaveScoreFiles(scores, file, localDirPath)
    #printing summary scores for particular methods (ZIP/HSA/Bliss/Loewe) in console and log
    flog.info(paste("ZIP: ", summary_scores[1]))
    flog.info(paste("HSA: ", summary_scores[2]))
    flog.info(paste("Bliss: ", summary_scores[3]))
    flog.info(paste("Loewe: ", summary_scores[4]))

    setwd(currentPath)
}

#####
# ---- SETTING THE MAIN LOOP - process all files in the input path ----#
#####

# list all files in input path
all_files = list.files(path = inputDirPath)
# setting the logging utility
flog.appender(appender.tee('logs.txt'))
flog.info("---- WORK STARTED ----")

for (file in all_files) {
    tryCatch({
        flog.info(paste("Going to process file: ", file))

        ProcessExperiment(file)

        flog.info(paste("Finished processing file: ", file))
    }, error = function(err) {
        setwd(currentPath)

        flog.error(paste("Error occured while processing file: ", file))
        flog.error(err)
    })
}

flog.info("---- WORK DONE ----")

```

**Code S2.** Python script for drug combination analysis with the use of Synergy package. The script is processing all files in the input directory and prints drug interaction metrics in the console and log.

```
# Python code for calculating drug interaction metrics using Synergy package.

# load needed libraries
import pandas as pd
import numpy as np
import os
import sys
import logging
import openpyxl
from pathlib import Path
# import models which will be used to calculate drug interaction metrics
from synergy.combination import MuSyC

def process_synergy(src_file):
    # add information about actually processed file in console and log
    logging.info("Processing file %s" % src_file)
    print("Processing file %s" % src_file)
    # read your input data excel file and setting the dataframe (read data from first sheet)
    df = pd.read_excel(src_file, sheet_name=0)
    df['drug1.conc'] = df['drug1.conc']
    df['drug2.conc'] = df['drug2.conc']
    d1 = df['drug1.conc']
    d2 = df['drug2.conc']
    d1_name = df['drug1_name'][0]
    d2_name = df['drug2_name'][0]
    cell_line_name = df['cell_line_name'][0]
    experiment_number = df['experiment_number'][0]
    effect = df['effect']

    # automatic bounds values selection based on rounded min/max values for control, drug 1, drug 2 and their
    combination wells
    # indicating indexes for control, drug 1, drug 2 and their combination from which bounds will be
    calculated
    E0_indexes = [0]
    E1_indexes = [6, 12, 18, 24, 30]
    E2_indexes = slice(1, 6)
    E3_indexes = [slice(7,12), slice(13,18), slice(19,24), slice(25,30), slice(31,36)]

    # get values for particular bounds
    E1_values = effect.array[E1_indexes]
    E2_values = effect.array[E2_indexes]
    E3_values = []
    for group in E3_indexes:
        E3_values = np.append(E3_values, effect[group].array)

    # setting bounds values
    E0_bounds = (0.8, 1.2)
    E1_bounds = (round(min(E1_values), 1), round(max(E1_values), 1))
    E2_bounds = (round(min(E2_values), 1), round(max(E2_values), 1))
    E3_bounds = (round(min(E3_values), 1), round(max(E3_values), 1))

    # printing selected bounds in console and log
    logging.info("E0 bounds: %s - %s" % E0_bounds)
    logging.info("E1 bounds: %s - %s" % E1_bounds)
    logging.info("E2 bounds: %s - %s" % E2_bounds)
    logging.info("E3 bounds: %s - %s" % E3_bounds)
    print("E0 bounds: %s - %s" % E0_bounds)
    print("E1 bounds: %s - %s" % E1_bounds)
    print("E2 bounds: %s - %s" % E2_bounds)
```

```

print("E3 bounds: %s - %s" % E3_bounds)

# setting bounds for MuSyC model
musyc_model_full = MuSyC(E0_bounds=E0_bounds, E1_bounds=E1_bounds, E2_bounds=E2_bounds,
E3_bounds=E3_bounds, variant="full")

# calculating drug interaction metrics using MuSyC model
musyc_model_full.fit(d1, d2, effect, bootstrap_iterations=100, max_nfev=5000)

# printing calculated drug interaction metrics and fit goodness in console and log
# logging.info(musyc_model_full.summary())
logging.info("AIC - %s" % musyc_model_full.aic)
logging.info("BIC - %s" % musyc_model_full.bic)
logging.info("R^2 - %s" % musyc_model_full.r_squared)
print("AIC - %s" % musyc_model_full.aic)
print("BIC - %s" % musyc_model_full.bic)
print("R^2 - %s" % musyc_model_full.r_squared)
parameters = musyc_model_full.get_parameters(confidence_interval=95)
logging.info(parameters)
print(parameters)

# set your input and logs directories
input_dir_path = "set here your input path"
logs_dir_path = "set here your logs path"

# prepare logs
if not os.path.exists(logs_dir_path):
    os.mkdir(logs_dir_path)

# logger setup
logging.basicConfig(level=logging.INFO, filename='log/main.log', format='%(asctime)s :: %(levelname)s ::
%(message)s')

### MAIN LOOP ###
with os.scandir(input_dir_path) as entries: # iterate over files in input directory
    for entry in entries:
        # take only xlsx files to process
        if entry.is_file() and (entry.name.endswith('.xlsx') or entry.name.endswith('.xls')):
            try: # process each file
                process_synergy(os.path.join(input_dir_path, entry.name))
            except Exception as err: # log info about errors
                logging.info("ERROR IN FILE %s --- %s" % (entry.name, err))

logging.info('Done.')
```
